# Supplementary material for: Transcriptomic Landscape and Functional Characterization of Human Induced Pluripotent Stem Cell-Derived Limbal Epithelial Progenitor Cells
Source: MDPI journal article supplement (doi:10.3390/cells11233752), 2022-11-24
Supplement: s1 [file s1]

## **Supplemental Information**

### **Transcriptomic Landscape and Functional Characterization of Human Induced Pluripotent Stem Cell-derived Limbal Epithelial Progenitor cells**

Naresh Polisetti<sup>1\*</sup>, Julian Rapp<sup>1</sup>, Paula Liang<sup>1</sup>, Viviane Dettmer-Monaco<sup>2</sup>, Felicitas Bucher<sup>1</sup>, Jan Pruszek<sup>3, #4</sup>, Ursula Schlötzer-Schrehardt<sup>5</sup>, Toni Cathomen<sup>2,3</sup>, Günther Schlunck<sup>1</sup>, Thomas Reinhard<sup>1</sup>

<sup>1</sup>Eye Center, Medical Center - Faculty of Medicine, University of Freiburg, Killianstrasse 5, 79106, Freiburg, Germany

<sup>2</sup>Institute for Transfusion Medicine and Gene Therapy, Medical Center – University of Freiburg, Freiburg, Germany.

<sup>3</sup>Freiburg iPS Core, Center for Chronic Immunodeficiency, Medical Center – University of Freiburg, Freiburg, Germany.

<sup>#4</sup>current address: Institute of Anatomy and Cell Biology, Paracelsus Medical University, Salzburg, Austria

<sup>5</sup>Department of Ophthalmology, University Hospital Erlangen, Friedrich-Alexander-University of Erlangen-Nürnberg, Schwabachanlage 6, D-91054 Erlangen, Germany

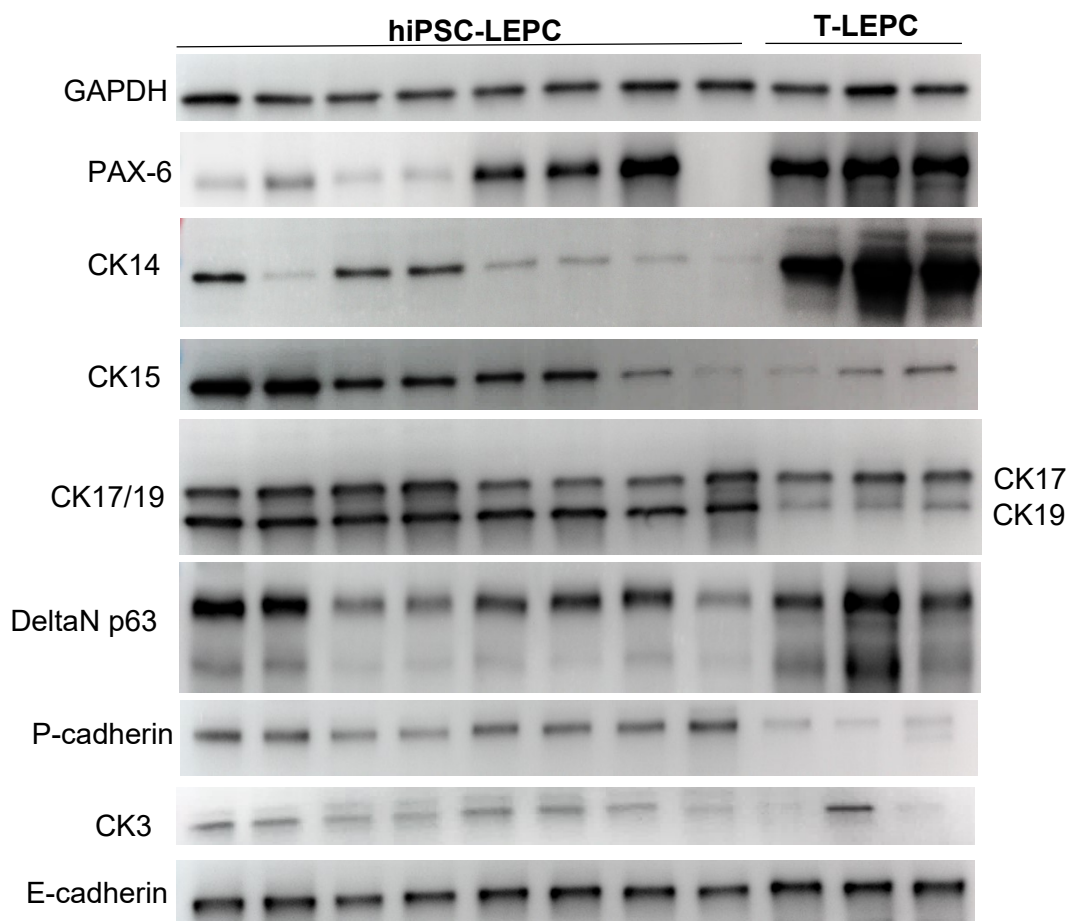

**Figure S1:** Western blot analysis of hiPSC-LEPC (eight individual experiments and T-LEPC (three individual experiments) showing the expression of ocular developmental marker (PAX6, 7/8 samples), limbal epithelial progenitor markers (CK14, CK15, CK17/19, DeltaN p63 (95 & 75 kDa), P-cadherin) and corneal epithelial differentiation markers (CK3 and E-cadherin). Reprobing with an anti-GAPDH antibody served as a control

A

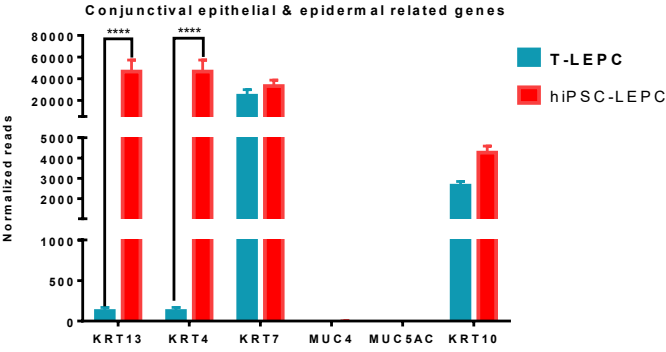

B

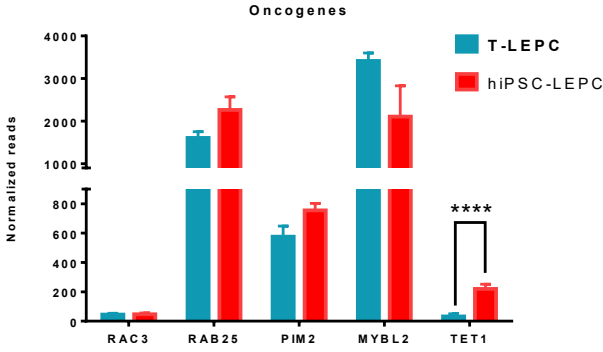

**Figure S2: A)** RNA sequencing analysis of hiPSC-LEPC and T-LEPC shows the expression of conjunctival and epidermal related genes. Genes considered differentially expressed log2 fold change >2.0,  $p < 0.05$ . Data are expressed as mean  $\pm$  standard error of the mean. \*\*\*\* $p < 0.0001$  **B)** The graph showing the expression of oncogenes in hiPSC-LEPC and T-LEPC. Genes considered differentially expressed log2 fold change >2.0,  $p < 0.05$ . Data are expressed as mean  $\pm$  standard error of the mean. \*\*\*\* $p < 0.0001$

**A**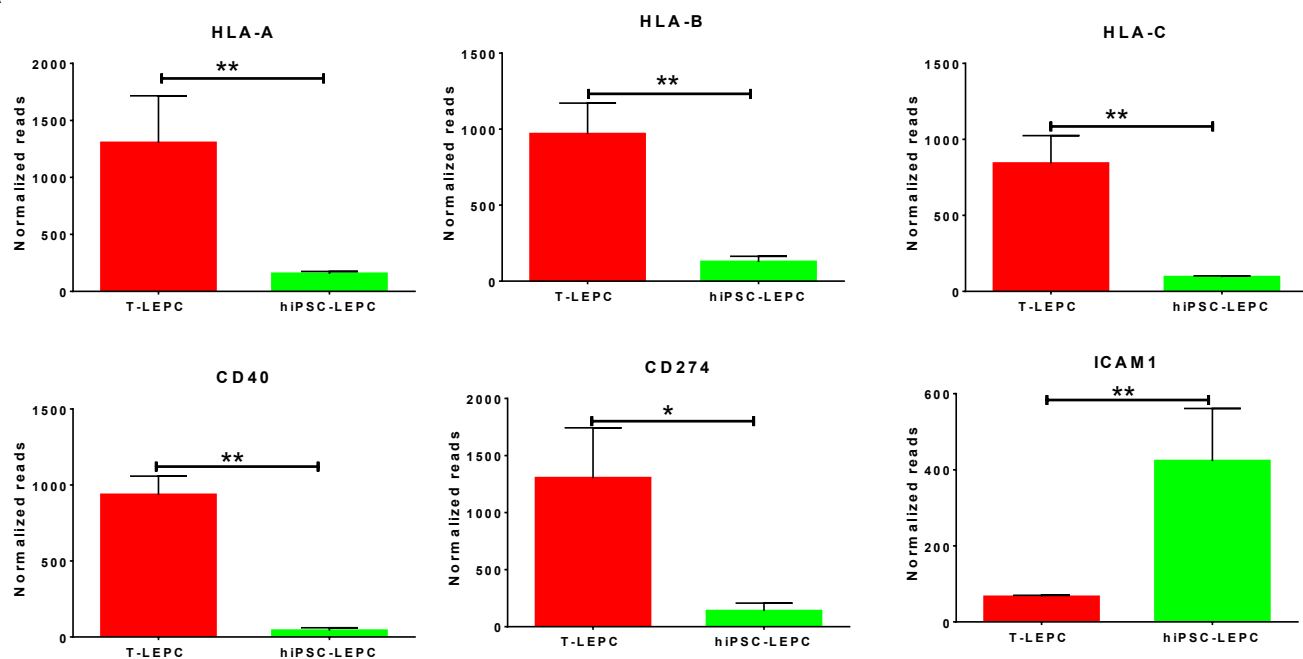**B**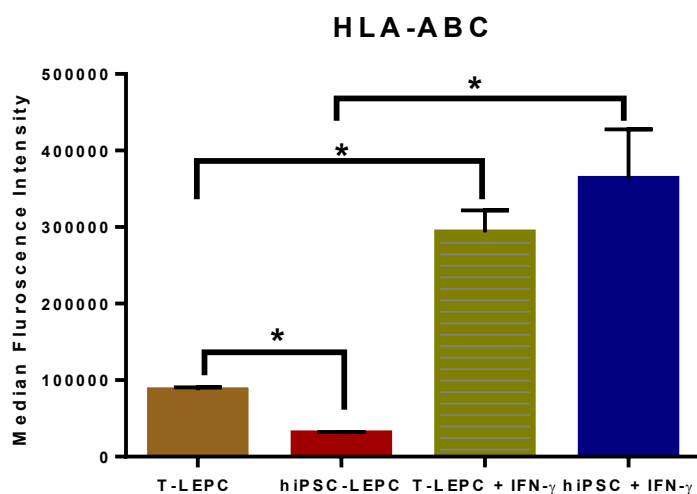

**Figure S3:** A) RNA sequencing data analysis of immune related genes expression in hiPSC-LEPC and T-LEPC. \*p<0.05; \*\*p<0.01 B) Flow cytometric analysis shows median fluorescence intensity of HLA-ABC expression in T-LEPC and hiPSC-LEPC in presence or absence of Interferon- $\gamma$ . Data are expressed as mean  $\pm$  standard error of the mean of 4 individual experiments. \*p<0.05.

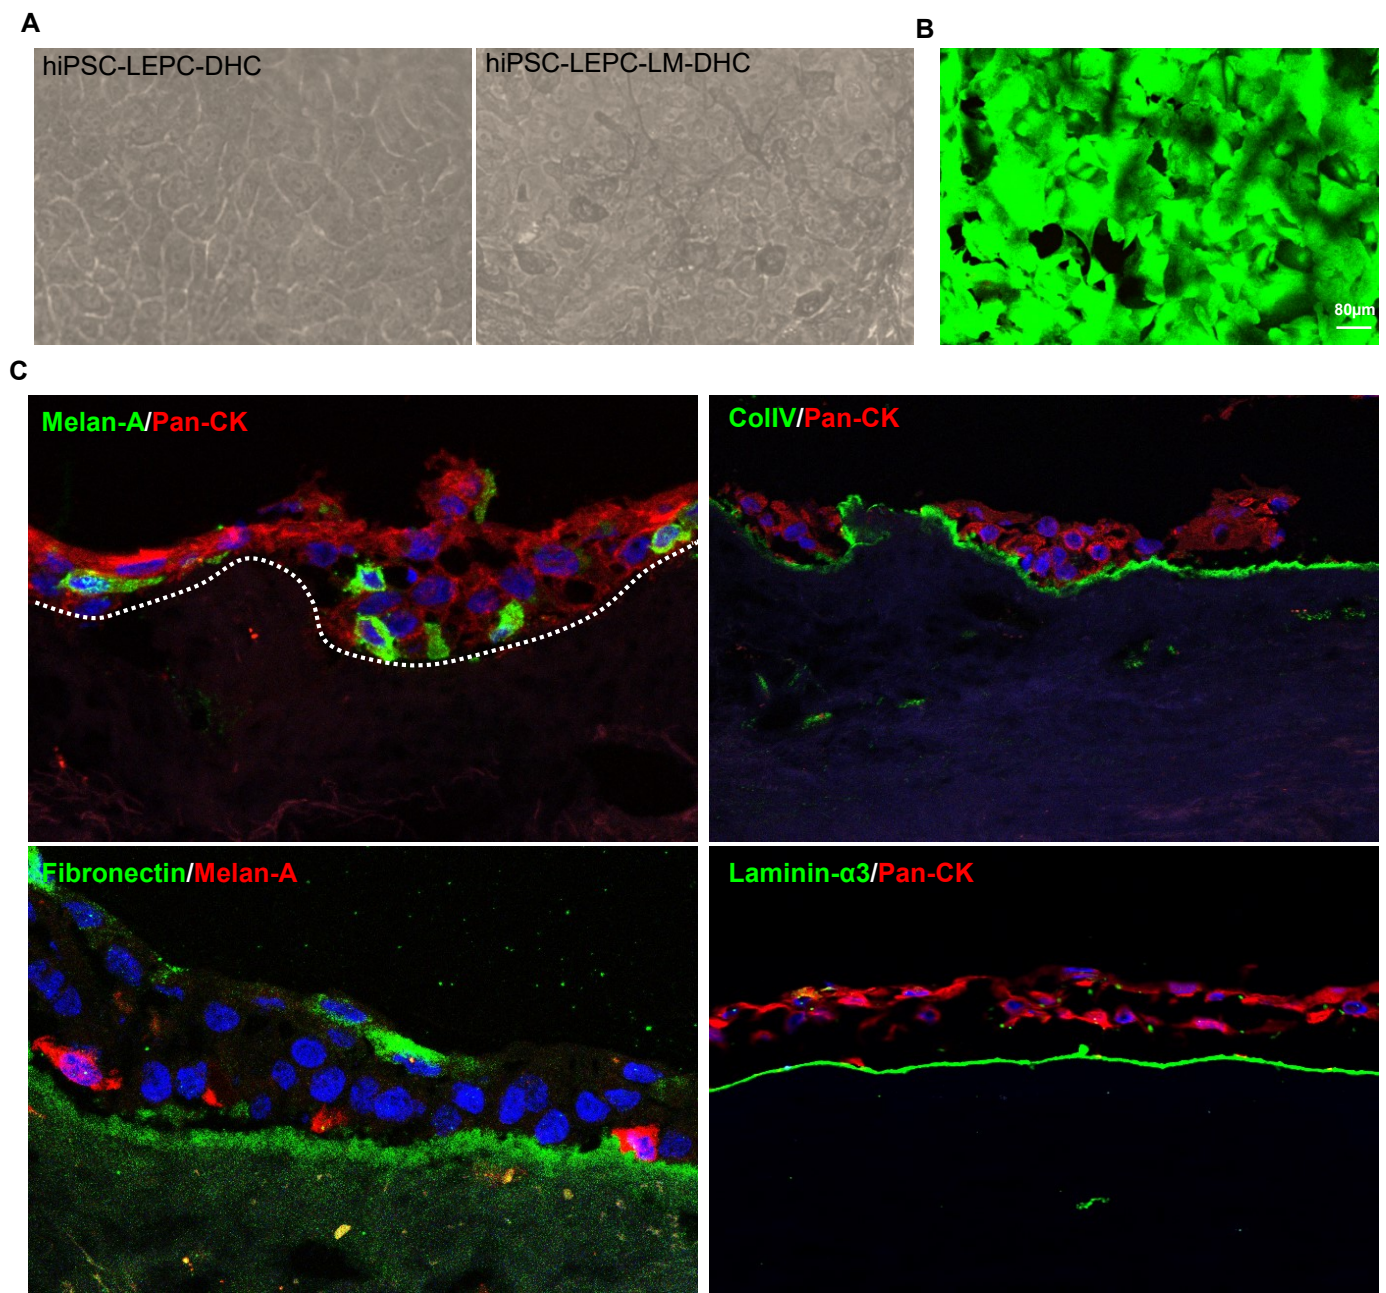

**Figure S4.** A: Phase contrast micrographs show the presence of hiPSC-LEPC and LM on the surface of decellularized corneal scaffolds. B) Live/dead staining of the hiPSC-LEPC/DHC scaffolds show the cells remained viable (green) after 48h of cultivation. **C)** Double immunofluorescence staining of DHC/L-hiPSC-LEPC-LM scaffolds showing the expression of cytokeratin (pan-CK, red) in all epithelial cells and Melan-A<sup>+</sup> melanocytes (green) associated with basal cells (the dotted line represents basement membrane); intact fibronectin, col IV, and laminin-α3 expression (green)

| S.no. | Age (Years) | Post mortem time (h) | Duration of cultivation (days) |
|-------|-------------|----------------------|--------------------------------|
| 1     | 75          | 12,08                | 24,52                          |
| 2     | 60          | 42,17                | 27,44                          |
| 3     | 68          | 15,14                | 26,34                          |
| 4     | 68          | 15,14                | 29,84                          |
| 5     | 54          | 30,25                | 31,43                          |
| 6     | 78          | 39,93                | 28,54                          |
| 7     | 71          | 67,42                | 18,70                          |
| 8     | 71          | 67,62                | 24,50                          |
| 9     | 66          | 26,57                | 18,50                          |
| 10    | 66          | 26,57                | 21,50                          |
| 11    | 74          | 23,87                | 24,78                          |
| 12    | 65          | 38,50                | 23,18                          |
| 13    | 78          | 60,63                | 21,43                          |
| 14    | 78          | 60,63                | 22,43                          |
| 15    | 74          | 32,17                | 21,52                          |
| 16    | 68          | 28,92                | 18,53                          |
| 17    | 59          | 25,16                | 16,56                          |
| 18    | 79          | 24,19                | 33,46                          |
| 19    | 87          | 28,75                | 25,47                          |
| 20    | 87          | 26,38                | 31,14                          |
| 21    | 92          | 45,26                | 18,04                          |
| 22    | 81          | 37,34                | 34,86                          |
| 23    | 81          | 36,72                | 32,55                          |
| 24    | 75          | 23,64                | 35,46                          |
| 25    | 59          | 12,24                | 31,37                          |

**Table S1:** Organ cultured corneal scleral tissues used in this study

| <b>Antibody (clone), Host species</b>  | <b>Antibody dilution</b>            | <b>Application</b>                      | <b>Antibody source</b>         |
|----------------------------------------|-------------------------------------|-----------------------------------------|--------------------------------|
| Cadherin-E (24E10), Rabbit             | 1:200                               | Immunohistochemistry                    | Cell signaling                 |
| Cadherin-P (A-10), Mouse               | 1:100                               | Immunohistochemistry                    | Santa Cruz Biotechnology, INC. |
| Cadherin-P/Alexa488, Mouse             | 5 µl/10 <sup>6</sup> cells          | Flow cytometry                          | R&D systems                    |
| CD90 APC(5E10), Mouse                  | 5 µl/10 <sup>6</sup> cells<br>1:400 | Flow cytometry<br>Immunohistochemistry  | BD Biosciences                 |
| CD117 PE (A3C6E2), Mouse               | 5 µl/10 <sup>6</sup> cells          | Flow cytometry                          | Miltenyi Biotec                |
| CD117 PE (YB5.B8), Mouse               | 5 µl/10 <sup>6</sup> cells          | Flow cytometry                          | BD Pharmingen                  |
| CD200 Alexa-647 (OX-104), Mouse        | 5 µl/10 <sup>6</sup> cells          | Flow cytometry                          | Biolegend                      |
| Collagen Type IV (2F11), Mouse         | 1:200                               | Immunohistochemistry                    | SouthernBiotech                |
| Cytokeratin pan (PCK-26), Mouse        | 1:500                               | Immunohistochemistry                    | Abcam                          |
| Cytokeratin 3/76 (AE5), Mouse          | 1:100                               | Immunohisto/cytochemistry               | Millipore                      |
| Cytokeratin 12 (EPR17882), Rabbit      | 1:50                                | Immunohistochemistry                    | Abcam                          |
| Cytokeratin 14 (LL002) Mouse           | 1:500                               | Immunohisto/cytochemistry               | Abcam                          |
| Cytokeratin 15 (LHK15), Mouse          | 1:500                               | Immunohistochemistry                    | Abcam                          |
| Cytokeratin 15 (EPR1614Y), Rabbit      | 1:500                               | Immunohistochemistry                    | Abcam                          |
| Cytokeratin 17/19 (D4G2)               | 1:50                                | Immunocytochemistry                     | Cell Signaling                 |
| Fibronectin (IST-4), Mouse             | 1:100                               | Immunohistochemistry                    | Sigma-Aldrich                  |
| IgG2a, k, Isotype PE (MOPC-173), mouse | 5 µl/10 <sup>6</sup> cells          | Flow cytometry                          | Biolegend                      |
| IgG3, k Isotype FITC (MG3-35), mouse   | 5 µl/10 <sup>6</sup> cells          | Flow cytometry                          | Biolegend                      |
| IgG2a, k Isotype APC (eBM2a), mouse    | 5 µl/10 <sup>6</sup> cells          | Flow cytometry                          | Invitrogen                     |
| ITGB4 PE (58XB4), Mouse                | 5 µl/10 <sup>6</sup> cells          | Flow cytometry                          | Biolegend                      |
| Ki-67 (EPR3610), Rabbit                | 1:500                               | Immunohistochemistry                    | Abcam                          |
| Laminin alpha 3 (546215), Mouse        | 1:200                               | Immunohistochemistry                    | R&D systems Biotechnie         |
| Melan A, (EPR20380), Rabbit            | 1:500                               | Immunohisto/cytochemistry               | Abcam                          |
| DeltaN p63 (E6Q3O)                     | 1:500                               | Immunohisto/cytochemistry               | Cell Signaling                 |
| PAX6 (Poly19013), Rabbit               | 1:1000                              | Immunohistochemistry<br>Westernblotting | Biolegend                      |
| SSEA4 FITC (MC-813-70), Mouse          | 5 µl/10 <sup>6</sup> cells          | 5 µl/10 <sup>6</sup> cells              | Biolegend                      |
| Vimentin, (D21H3), Rabbit              | 1:500                               | Immunohistochemistry                    | Cell Signaling                 |

**Table S2.** List of antibodies used
